# Supplementary material
Source: PubMed Central journal article supplement (PMC2639338)
Supplement: msn192_3.pdf [file msn192_3.pdf]

(A)

5'-variable region

|          |          |         |         |       |        |        |        |        |        |        |        |         |          |           |           |        |      |
|----------|----------|---------|---------|-------|--------|--------|--------|--------|--------|--------|--------|---------|----------|-----------|-----------|--------|------|
| SAR0438  | ATGGGAAA | TAAAAA  | GTTTGC  | ATGTA | CAAAAG | TCTT   | GCTTTT | TAATAG | TGTTG  | TAGCAG | GTTC   | GGCAA   | ...AAGT  | GATA      | .....A    | : 83   |      |
| SAB0389  | ATGGGATA | TAAAAA  | GGATGG  | ATGTA | CAAAAG | TCTT   | TATTTT | TAATAG | TGTTG  | TAGCAG | GTTC   | GGAAA   | ...AGATA | TG.....   | .....A    | : 83   |      |
| SAU0397  | ATGGGATA | TAAAAA  | AGCTTGC | ATGTA | CAAAAG | TCTT   | TATTTT | GGGCAT | TTTAT  | TAATAG | TTTAT  | GATATG  | TCACG    | CAATG     | CTG       | : 95   |      |
| SAA0419  | ATCGAGTA | TAAAAA  | AAATTC  | CTTGT | ATGTA  | CAAAAG | TCTT   | TAATCA | TTTAT  | TGTTGG | GTTC   | GGAATAT | GAAAC    | AGAAAA    | AGAGG     | : 100  |      |
| SAC0486  | ATGGGATA | TAAAAA  | AAATTC  | CTTGT | ATGTA  | CAAAAG | TCTT   | TAATCA | TTTAT  | TGTTGG | GTTC   | GGAATAT | GAAAC    | AGAAAA    | AGAGG     | : 100  |      |
| SAO0405  | ATGGAGTA | TAAAAA  | AAATTC  | CTTGT | ATGTA  | CAAAAG | TCTT   | TAATCA | TTTAT  | TGTTGG | GTTC   | GGAATAT | GAAAC    | AGAAAA    | AGAGG     | : 100  |      |
| SAM0397  | ATGGGATA | TAAAAA  | GGTTC   | GCATG | TA     | CAAAAG | TCTT   | TAATAG | TTTAT  | TAGCAG | GTTC   | GGCAA   | ...AAGT  | GATA      | .....A    | : 83   |      |
| SAB0390p | ATGGGATA | TAAAAA  | GGTTC   | GCATG | TA     | CAAAAG | TCTT   | TAATAG | TTTAT  | TAGCAG | GTTC   | GGTAA   | ...AAGT  | GATA      | .....A    | : 83   |      |
| SAR0440p | ATGGGACA | TAAAAA  | AGCTTGC | ATGTA | CAAAAG | TCTT   | TATTTT | GAGCAT | TTTAT  | TAATAG | TTTAT  | GATATG  | TCACG    | CAATG     | CTG       | : 95   |      |
| SAU0402  | ATGGGTAT | TAAAAA  | GACCTG  | TATG  | TACAA  | AGTTA  | TGGT   | TATG   | AGTCT  | TTTAT  | TAATAG | TTTAT   | GATATG   | TCACG     | CAATG     | : 98   |      |
| SAM0399  | ATGGAAAT | TAAAAA  | GGCTTC  | GCATG | TA     | CAAAAG | TCTT   | TAATAG | TTTAT  | TAGCAG | GTTC   | GATAGT  | CAAGCG   | AT        | ..ACTG    | : 98   |      |
| SAC0396p | ATGGAGTA | TAAAAA  | AAATTC  | CTTGT | ATGTA  | CAAAAG | TCTT   | TAATCA | TTTAT  | TGTTGG | GTTC   | GGAATAT | GAAAC    | AGAAAA    | AGAGG     | : 99   |      |
| SAU0396  | ATCGGATA | TAAAAA  | GACCTT  | GCATG | TA     | CAAAAG | TCTT   | TAATAG | TTTAT  | TAGCAG | GTTC   | GGCAA   | ...GGTA  | TG.....   | .....A    | : 88   |      |
| SAA0410  | ATGGGATA | TAAAAA  | GGTTC   | GCATG | TA     | CAAAAG | TCTT   | TAATAG | TTTAT  | TAGCAG | GTTC   | GGCAA   | ...GGTA  | TG.....   | .....A    | : 88   |      |
| SAR0439  | ATGGGATA | TAAAAA  | GGTTC   | GCATG | TA     | CAAAAG | TCTT   | TAATAG | TTTAT  | TAGCAG | GTTC   | GGCAA   | ...GGTA  | TG.....   | .....A    | : 88   |      |
| SAU0403  | ATGGGATA | TAAAAA  | GAGTTC  | TAC   | TACAA  | AAATG  | TGTTG  | TATG   | AGTCT  | TTTAT  | TAATAG | TTTAT   | GATATG   | TCACG     | CAATG     | : 100  |      |
| SAR0443  | ATGGATA  | TAAAAA  | GAGTTC  | TAC   | TACAA  | AAATG  | TGTTG  | TATG   | AGTCT  | TTTAT  | TAATAG | TTTAT   | GATATG   | TCACG     | CAATG     | : 100  |      |
| SAA0417  | ATGGGATA | TAAAAA  | GAAATTC | GCATG | TA     | CAAAAG | TCTT   | TAATAG | TTTAT  | TGTTGG | GTTC   | GGAATAT | GAAAC    | AGAAAA    | AGAGG     | : 100  |      |
| SAC0484  | ATGGGATA | TAAAAA  | GAAATTC | GCATG | TA     | CAAAAG | TCTT   | TAATAG | TTTAT  | TGTTGG | GTTC   | GGAATAT | GAAAC    | AGAAAA    | AGAGG     | : 100  |      |
| SAO0402  | ATGGGATA | TAAAAA  | GGTTC   | GCATG | TA     | CAAAAG | TCTT   | TAATAG | TTTAT  | TGTTGG | GTTC   | GGCAA   | ...AGTA  | TG.....   | .....A    | : 94   |      |
| SAM0401  | ATGGAGTA | TAAAAA  | AAATTC  | CTTGT | ATGTA  | CAAAAG | TCTT   | TAATCA | TTTAT  | TGTTGG | GTTC   | GGAATAT | GAAAC    | AGAAAA    | AGAGG     | : 100  |      |
| SAU0405  | ATCGAGTA | TAAAAA  | AAATTC  | CTTGT | ATGTA  | CAAAAG | TCTT   | TAATCA | TTTAT  | TGTTGG | GTTC   | GGAATAT | GAAAC    | AGAAAA    | AGAGG     | : 100  |      |
| SAA0413  | ATGGGTAT | TAAAAA  | GACCTG  | TATG  | TACAA  | AGTTA  | TGGT   | TATG   | AGTCT  | TTTAT  | TAATAG | TTTAT   | GATATG   | TCACG     | CAATG     | : 97   |      |
| SAU0400  | ATGAGGGA | TCAAAAA | GAGTTC  | AGTAT | GTA    | CAAAAG | TCTT   | GATATG | TCACG  | CAATG  | TTTAT  | TAATAG  | TTTAT    | GATATG    | TCACG     | : 88   |      |
| SAA0411  | ATCGGATA | TAAAAA  | AGCTTGC | ATGTA | CAAAAG | TCTT   | TATTTT | GAGCAT | TTTAT  | TAATAG | TTTAT  | GATATG  | TCACG    | CAATG     | CTG       | : 100  |      |
| SAR0442  | ATGGGATA | TAAAAA  | GGATTC  | GCATG | TA     | CAAAAG | TCTT   | TAATAG | TTTAT  | TAGCAG | GTTC   | GGTGGT  | ...GGTA  | TG.....   | .....A    | : 88   |      |
| SAB0393  | ATGAATAA | TTTAGG  | CAATG   | CGCGT | GTG    | TAA    | AGGTC  | CATCGG | TCTT   | TAATCA | TTTAT  | TAGT    | TCACG    | CAATG     | CTG       | : 88   |      |
| SAM0398  | ATCGGATA | TAAAAA  | GGATTC  | GCATG | TA     | CAAAAG | TCTT   | TAATAG | TTTAT  | TAGCAG | GTTC   | GGTGGT  | ...GGTA  | TG.....   | .....A    | : 88   |      |
| SAA0414  | ATGAAGTC | TAAAAA  | GGATTC  | GCATG | TA     | CAAAAG | TCTT   | TAATAG | TTTAT  | TAGCAG | GTTC   | GATGGT  | ...GATA  | TG.....   | .....A    | : 88   |      |
| SAC0481  | ATGGGATA | TAAAAA  | GGTTC   | GCATG | TA     | CAAAAG | TCTT   | TAATAG | TTTAT  | TAGCAG | GTTC   | GGCAA   | ...GGTA  | TG.....   | .....A    | : 88   |      |
| SAU0398  | ATGGGATA | TAAAAA  | GGTTC   | GCATG | TA     | CAAAAG | TCTT   | TAATAG | TTTAT  | TAGCAG | GTTC   | GGC     | ...AAAA  | GATG..... | .....A    | : 89   |      |
| SAB0392  | ATGGGATA | TAAAAA  | AGGTTGC | ATG   | TAA    | AGCCG  | TGTA   | GATTT  | TAATAG | TTTAT  | TAGCAG | GTTC    | GGT      | ...GGT    | GATG..... | .....A | : 89 |
| SAU0399p | ATGAATAA | TTTAGG  | CAATG   | CGCGT | GTG    | TAA    | AGGTC  | CATCGG | TCTT   | TAATCA | TTTAT  | TAGT    | TCACG    | CAATG     | CTG       | : 88   |      |
| SAU0404  | ATCAAGTC | TAAAAA  | GGATTC  | GCATG | TA     | CAAAAG | TCTT   | TAATCA | TTTAT  | TGCAAC | ATCT   | CGT     | ...AGT   | ...AAT    | ...AAG    | : 86   |      |
| SAR0444  | ATGAAGTC | TAAAAA  | GGATTC  | GCATG | TA     | CAAAAG | TCTT   | TAATCA | TTTAT  | TGCAAC | ATCT   | CGT     | ...AGT   | ...AAT    | ...AAG    | : 86   |      |
| SAO0404  | ATGAAGTC | TAAAAA  | GGATTC  | GCATG | TA     | CAAAAG | TCTT   | TAATCA | TTTAT  | TGCAAC | ATCT   | CGT     | ...AGT   | ...AAT    | ...AAG    | : 86   |      |
| SAC0485  | ATGAAGTC | TAAAAA  | GGATTC  | GCATG | TA     | CAAAAG | TCTT   | TAATCA | TTTAT  | TGCAAC | ATCT   | CGT     | ...AGT   | ...AAT    | ...AAG    | : 86   |      |
| SAA0418  | ATGAAGTC | TAAAAA  | GGATTC  | GCATG | TA     | CAAAAG | TCTT   | TAATCA | TTTAT  | TGCAAC | ATCT   | CGT     | ...AGT   | ...AAT    | ...AAG    | : 86   |      |
| SAA0416  | ATGAAGTC | TAAAAA  | GGATTC  | GCATG | TA     | CAAAAG | TCTT   | TAATCA | TTTAT  | TGCAAC | ATCT   | CGT     | ...AGT   | ...AAT    | ...AAG    | : 86   |      |
| SAC0483  | ATGAAGTC | TAAAAA  | GGATTC  | GCATG | TA     | CAAAAG | TCTT   | TAATCA | TTTAT  | TGCAAC | ATCT   | CGT     | ...AGT   | ...AAT    | ...AAG    | : 86   |      |
| SAB0395  | ATGAAGTC | TAAAAA  | GGATTC  | GCATG | TA     | CAAAAG | TCTT   | TAATCA | TTTAT  | TGCAAC | ATCT   | CGT     | ...AGT   | ...AAT    | ...AAG    | : 86   |      |
| SAM0400  | ATGGGATA | TAAAAA  | GAGTTC  | TAC   | TACAA  | AAATG  | TGTTG  | TATG   | AGTCT  | TTTAT  | TAATAG | TTTAT   | GATATG   | TCACG     | CAATG     | : 100  |      |
| SAA0415  | ATGGAATA | TAAAAA  | GGCTTC  | GCATG | TA     | CAAAAG | TCTT   | TAATAG | TTTAT  | TGTTGG | GTTC   | GATAGT  | CAAGCG   | AT        | ..ACTG    | : 100  |      |
| SAC0482  | ATGGAATA | TAAAAA  | GGCTTC  | GCATG | TA     | CAAAAG | TCTT   | TAATAG | TTTAT  | TGTTGG | GTTC   | GATAGT  | CAAGCG   | AT        | ..ACTG    | : 100  |      |
| SAB0394  | ATGAGATA | TAAAAA  | GAGTTC  | TAC   | TACAA  | AAATG  | TGTTG  | TATG   | AGTCT  | TTTAT  | TAATAG | TTTAT   | GATATG   | TCACG     | CAATG     | : 100  |      |
| SAU0401  | ATCGGATA | TAAAAA  | GGTTC   | GCATG | TA     | CAAAAG | TCTT   | TAATAG | TTTAT  | TAGCAG | GTTC   | GGTAA   | ...AAGT  | GATA      | .....A    | : 90   |      |
| SAA0412p | ATGTGGT  | CAAAAA  | GAAATTC | GCATG | TA     | CAAAAG | TCTT   | TAATAG | TTTAT  | TAGCAG | GTTC   | GATAGT  | CAAGCG   | AT        | ..GCAG    | : 98   |      |
| SAR0445  | ATGGGATA | TAAAAA  | AAATTC  | CTTGT | ATGTA  | CAAAAG | TCTT   | TAATCA | TTTAT  | TGTTGG | GTTC   | GGAATAT | GAAAC    | AGAAAA    | AGAGG     | : 100  |      |

Predicted signal peptide

Cys

5'-variable region

Central conserved region

|          |                    |         |       |          |          |         |         |        |        |         |         |      |        |        |     |      |       |       |       |       |
|----------|--------------------|---------|-------|----------|----------|---------|---------|--------|--------|---------|---------|------|--------|--------|-----|------|-------|-------|-------|-------|
| SAR0438  | AACAAAAGAA         | .....   | GATTC | CAAAAGAA | GAA      | CAAAAT  | TAAAAAG | AGCTTT | GCGAAA | CA      | TAGATAT | GTA  | TCAA   | TAAGAA | CTC | GAG  | CACT  | TATAT | G     | : 176 |
| SAB0389  | AATAAAAGAA         | .....   | TATTC | CAAAAGAA | CAAAAT   | TAAAAAG | AGCTTT  | GCGAAA | CA     | TAGATAT | GTA     | TCAA | TAAGAA | CTC    | GAG | CACT | TATAT | G     | : 176 |       |
| SAU0397  | AGCAAAGAA          | .....   | GATTC | CAAAAGAA | GAA      | CAAAAT  | TAAAAAG | AGCTTT | GCGAAA | CA      | TAGATAT | GTA  | TCAA   | TAAGAA | CTC | GAG  | CACT  | TATAT | G     | : 188 |
| SAA0419  | AACAAACGAATAAAACA  | .....   | GATTC | CAAAAGAA | GAA      | CAAAAT  | TAAAAAG | AGCTTT | GCGAAA | CA      | TAGATAT | GTA  | TCAA   | TAAGAA | CTC | GAG  | CACT  | TATAT | G     | : 200 |
| SAC0486  | AACAAACGAATAAAACA  | .....   | GATTC | CAAAAGAA | GAA      | CAAAAT  | TAAAAAG | AGCTTT | GCGAAA | CA      | TAGATAT | GTA  | TCAA   | TAAGAA | CTC | GAG  | CACT  | TATAT | G     | : 200 |
| SAO0405  | AACAAACGAATAAAACA  | .....   | GATTC | CAAAAGAA | GAA      | CAAAAT  | TAAAAAG | AGCTTT | GCGAAA | CA      | TAGATAT | GTA  | TCAA   | TAAGAA | CTC | GAG  | CACT  | TATAT | G     | : 200 |
| SAM0397  | AACAAAAGAA         | .....   | GATTC | CAAAAGAA | GAA      | CAAAAT  | TAAAAAG | AGCTTT | GCGAAA | CA      | TAGATAT | GTA  | TCAA   | TAAGAA | CTC | GAG  | CACT  | TATAT | G     | : 176 |
| SAB0390p | AACAAAAGAA         | .....   | GATTC | CAAAAGAA | GAA      | CAAAAT  | TAAAAAG | AGCTTT | GCGAAA | CA      | TAGATAT | GTA  | TCAA   | TAAGAA | CTC | GAG  | CACT  | TATAT | G     | : 176 |
| SAR0440p | AGCAAAGAA          | .....   | GATTC | CAAAAGAA | GAA      | CAAAAT  | TAAAAAG | AGCTTT | GCGAAA | CA      | TAGATAT | GTA  | TCAA   | TAAGAA | CTC | GAG  | CACT  | TATAT | G     | : 188 |
| SAU0402  | AAAAGA             | .....   | AGTTC | CAAAAGAA | GAA      | CAAAAT  | TAAAAAG | AGCTTT | GCGAAA | CA      | TAGATAT | GTA  | TCAA   | TAAGAA | CTC | GAG  | CACT  | TATAT | G     | : 188 |
| SAM0399  | AAAAGA             | .....   | AGTTC | CAAAAGAA | GAA      | CAAAAT  | TAAAAAG | AGCTTT | GCGAAA | CA      | TAGATAT | GTA  | TCAA   | TAAGAA | CTC | GAG  | CACT  | TATAT | G     | : 188 |
| SAC0396p | AACAAACGAATAAAACA  | .....   | GATTC | CAAAAGAA | GAA      | CAAAAT  | TAAAAAG | AGCTTT | GCGAAA | CA      | TAGATAT | GTA  | TCAA   | TAAGAA | CTC | GAG  | CACT  | TATAT | G     | : 199 |
| SAU0396  | AAGAA              | .....   | AGTTC | CAAAAGAA | GAA      | CAAAAT  | TAAAAAG | AGCTTT | GCGAAA | CA      | TAGATAT | GTA  | TCAA   | TAAGAA | CTC | GAG  | CACT  | TATAT | G     | : 176 |
| SAA0410  | AAGAA              | .....   | AGTTC | CAAAAGAA | GAA      | CAAAAT  | TAAAAAG | AGCTTT | GCGAAA | CA      | TAGATAT | GTA  | TCAA   | TAAGAA | CTC | GAG  | CACT  | TATAT | G     | : 176 |
| SAR0439  | AAGAA              | .....   | AGTTC | CAAAAGAA | GAA      | CAAAAT  | TAAAAAG | AGCTTT | GCGAAA | CA      | TAGATAT | GTA  | TCAA   | TAAGAA | CTC | GAG  | CACT  | TATAT | G     | : 176 |
| SAU0403  | AAGAA              | .....   | AGTTC | CAAAAGAA | GAA      | CAAAAT  | TAAAAAG | AGCTTT | GCGAAA | CA      | TAGATAT | GTA  | TCAA   | TAAGAA | CTC | GAG  | CACT  | TATAT | G     | : 188 |
| SAR0443  | AAGAA              | .....   | AGTTC | CAAAAGAA | GAA      | CAAAAT  | TAAAAAG | AGCTTT | GCGAAA | CA      | TAGATAT | GTA  | TCAA   | TAAGAA | CTC | GAG  | CACT  | TATAT | G     | : 188 |
| SAA0417  | AACAAACAAATAAAACA  | .....   | GATTC | CAAAAGAA | GAA      | CAAAAT  | TAAAAAG | AGCTTT | GCGAAA | CA      | TAGATAT | GTA  | TCAA   | TAAGAA | CTC | GAG  | CACT  | TATAT | G     | : 200 |
| SAC0484  | AACAAACAAATAAAACA  | .....   | GATTC | CAAAAGAA | GAA      | CAAAAT  | TAAAAAG | AGCTTT | GCGAAA | CA      | TAGATAT | GTA  | TCAA   | TAAGAA | CTC | GAG  | CACT  | TATAT | G     | : 200 |
| SAO0402  | A.....             | .....   | TTCAA | AGGAAGAA | CAAAAT   | TAAAAAG | AGCTTT  | GCGAAA | CA     | TAGATAT | GTA     | TCAA | TAAGAA | CTC    | GAG | CACT | TATAT | G     | : 176 |       |
| SAM0401  | AACAAACGAATAAAACA  | .....   | GATTC | CAAAAGAA | GAA      | CAAAAT  | TAAAAAG | AGCTTT | GCGAAA | CA      | TAGATAT | GTA  | TCAA   | TAAGAA | CTC | GAG  | CACT  | TATAT | G     | : 200 |
| SAU0405  | CAAAATCAAAATAAAACA | .....   | GATTC | CAAAAGAA | GAA      | CAAAAT  | TAAAAAG | AGCTTT | GCGAAA | CA      | TAGATAT | GTA  | TCAA   | TAAGAA | CTC | GAG  | CACT  | TATAT | G     | : 200 |
| SAA0413  | CAAA               | .....   | AGAA  | CACT     | CGAAAGAA | CAAAAT  | TAAAAAG | AGCTTT | GCGAAA | CA      | TAGATAT | GTA  | TCAA   | TAAGAA | CTC | GAG  | CACT  | TATAT | G     | : 188 |
| SAU0400  | AAGAA              | .....   | GATTC | CAAAAGAA | GAA      | CAAAAT  | TAAAAAG | AGCTTT | GCGAAA | CA      | TAGATAT | GTA  | TCAA   | TAAGAA | CTC | GAG  | CACT  | TATAT | G     | : 176 |
| SAA0411  | AAGAA              | .....   | GATTC | CAAAAGAA | GAA      | CAAAAT  | TAAAAAG | AGCTTT | GCGAAA | CA      | TAGATAT | GTA  | TCAA   | TAAGAA | CTC | GAG  | CACT  | TATAT | G     | : 188 |
| SAR0442  | CTGGA              | .....   | GATTC | CAAAAGAA | CAAAAT   | TAAAAAG | AGCTTT  | GCGAAA | CA     | TAGATAT | GTA     | TCAA | TAAGAA | CTC    | GAG | CACT | TATAT | G     | : 176 |       |
| SAB0393  | CTGAA              | .....   | GATTC | CAAAAGAA | CAAAAT   | TAAAAAG | AGCTTT  | GCGAAA | CA     | TAGATAT | GTA     | TCAA | TAAGAA | CTC    | GAG | CACT | TATAT | G     | : 176 |       |
| SAM0398  | CTGGA              | .....   | GATTC | CAAAAGAA | CAAAAT   | TAAAAAG | AGCTTT  | GCGAAA | CA     | TAGATAT | GTA     | TCAA | TAAGAA | CTC    | GAG | CACT | TATAT | G     | : 176 |       |
| SAA0414  | CTGGA              | .....   | GATTC | CAAAAGAA | CAAAAT   | TAAAAAG | AGCTTT  | GCGAAA | CA     | TAGATAT | GTA     | TCAA | TAAGAA | CTC    | GAG | CACT | TATAT | G     | : 176 |       |
| SAC0481  | AAGAA              | .....   | GATTC | CAAAAGAA | GAA      | CAAAAT  | TAAAAAG | AGCTTT | GCGAAA | CA      | TAGATAT | GTA  | TCAA   | TAAGAA | CTC | GAG  | CACT  | TATAT | G     | : 176 |
| SAU0398  | A.....             | .....   | AGTTC | CAAAAGAA | CAAAAT   | TAAAAAG | AGCTTT  | GCGAAA | CA     | TAGATAT | GTA     | TCAA | TAAGAA | CTC    | GAG | CACT | TATAT | G     | : 176 |       |
| SAB0392  | T.....             | GG..... | AGTTC | CAAAAGAA | CAAAAT   | TAAAAAG | AGCTTT  | GCGAAA | CA     | TAGATAT | GTA     | TCAA | TAAGAA | CTC    | GAG | CACT | TATAT | G     | : 176 |       |
| SAU0399p | T.....             | GG..... | AGTTC | CAAAAGAA | CAAAAT   | TAAAAAG | AGCTTT  | GCGAAA | CA     | TAGATAT | GTA     | TCAA | TAAGAA | CTC    | GAG | CACT | TATAT | G     | : 175 |       |
| SAU0404  | T.....             | GG..... | AGTTC | CAAAAGAA | CAAAAT   | TAAAAAG | AGCTTT  | GCGAAA | CA     | TAGATAT | GTA     | TCAA | TAAGAA | CTC    | GAG | CACT | TATAT | G     | : 173 |       |
| SAR0444  | T.....             | GG..... | AGTTC | CAAAAGAA | CAAAAT   | T       |         |        |        |         |         |      |        |        |     |      |       |       |       |       |







### 3'-variable region

```

SAR0438  GATGAAGATA..GCTAA.....:783
SAB0389  GATGAAGATA..GCTAA.....:783
SAU0397  GATGAAGATA..GCTAA.....:795
SAA0419  GAAGGTGAGAATGTTGAGTAG.....:813
SAC0486  GAAGGTGAGAATGTTGAGTAG.....:813
SAO0405  GAAGGTGAGAATGTTGAGTAG.....:813
SAM0397  GATGGAGTTA..GCTAA.....:783
SAB0390P GATGAAAATA..GCTAA.....:782
SAR0440P GATGGAGG.A..GCTAAAGTTTATTAG:803
SAU0402  CACAGT..AATTAG.....:792
SAM0399  CATAGT..AATTAG.....:792
SAB0396P AAAAGGTGGAATAATGACTAA.....:812
SAU0396  AAAAAA..TAG.....:774
SAA0410  AAAAAA..TAG.....:774
SAR0439  AAAAAA..TAG.....:774
SAU0403  AAAGTGGATGAAGATGATGAATGA...:801
SAR0443  AAAGTGAATGAAGATGATGAATGA...:801
SAA0417  AAAGTAGATGAAGATGATGAATGA...:813
SAC0484  AAAGTAGATGAAGATGATGAATGA...:813
SAO0402  AAAGTAGATGAAGATGATGAATGA...:789
SAM0401  AAAGTGGATGAAGATGAAAAGATAA...:813
SAU0405  AAAGTGGATGAAGATGAAAAGATAA...:813
SAA0413  AAAACTAATAAAGATGATGAATAA...:801
SAU0400  AAAAAA..TAAAGATGATGAATGA...:786
SAA0411  AAAAAAAATAAAGATGATGAATGA...:801
SAR0442  AAAAAA..TAG.....:771
SAB0393  AAAAAA..TAG.....:771
SAM0398  AAAAAA..TAG.....:771
SAA0414  AAAAAA..TAG.....:771
SAC0481  AAAAAA..TAG.....:771
SAU0398  GAGAACTATTAG.....:786
SAB0392  GAGGACTATTAA.....:786
SAU0399P GACTAA.....:779
SAU0404  GAGGATAAATAA.....:783
SAR0444  GAGGATAAATAATAATTACTAA.....:795
SAO0404  GAGGATAAATAA.....:786
SAC0485  GAGGATAAATAA.....:786
SAA0418  GAGGATAAATAA.....:786
SAA0416  GAGGATAAATAA.....:777
SAC0483  GAGGATAAATAA.....:777
SAB0395  GTGGATAAATAA.....:777
SAM0400  GAGGATAAATAA.....:798
SAA0415  AAGTAA.....:792
SAC0482  AAGTAA.....:792
SAB0394  AAGTAA.....:792
SAU0401  .AACAAAATGA.....:783
SAA0412P .AACAAAATAA.....:797
SAR0445  GAGGAGACTATAATGAGTAA.....:819

```

(B)

5'-variable region

Central conserved region

3'-variable region

|         |      |       |        |        |         |     |           |      |       |        |        |       |        |        |       |     |      |       |       |      |       |       |     |      |      |
|---------|------|-------|--------|--------|---------|-----|-----------|------|-------|--------|--------|-------|--------|--------|-------|-----|------|-------|-------|------|-------|-------|-----|------|------|
| SAR0438 | MGNI | SFA   | YISILL | IVVVAG | CGKS    | ... | DKTKE     | ...  | DSKEE | QIKKSF | AKTLD  | MYPI  | IKNLED | LYDKE  | GYR   | DGE | FFKK | GDKGT | WTL   | LLTS | FSKSN | KP    | DE  | : 90 |      |
| SAB0389 | MGYL | RIG   | YISIFI | IVMVAG | CGKD    | ... | NEIKE     | ...  | YSKET | QIKNSF | AKTLD  | MYPI  | IKNLED | LYDKE  | GYR   | DGE | FFKK | GDKGT | WTL   | LLTS | FSKSN | KP    | GV  | : 90 |      |
| SAU0397 | MGYL | KLA   | FISVIT | GIFIFI | CGDSS   | ... | DTAEKAE   | ...  | DSKEE | QIKKSF | AKTLD  | MYPI  | IKNLED | LYDKE  | GYR   | DGE | FFKK | GDKGT | WTL   | LLTS | FSKSN | KP    | GE  | : 94 |      |
| SAO0405 | MEYL | KIA   | YMSVLL | IIFIGG | CGNMKD  | ... | EQQKEEQ   | TNKT | DSKEE | QIKKSF | AKTLD  | MYPI  | IKNLED | LYDKE  | GYR   | DGE | FFKK | GDKGT | WTL   | LLTS | FSKSN | KP    | GV  | : 98 |      |
| SAC0486 | MEYL | KIA   | YMSVLL | IIFIGG | CGNMKD  | ... | EQQKEEQ   | TNKT | DSKEE | QIKKSF | AKTLD  | MYPI  | IKNLED | LYDKE  | GYR   | DGE | FFKK | GDKGT | WTL   | LLTS | FSKSN | KP    | GV  | : 98 |      |
| SAA0419 | MEYL | KIA   | YMSVLL | IIFIGG | CGNMKD  | ... | EQQKEEQ   | TNKT | DSKEE | QIKKSF | AKTLD  | MYPI  | IKNLED | LYDKE  | GYR   | DGE | FFKK | GDKGT | WTL   | LLTS | FSKSN | KP    | GV  | : 98 |      |
| SAM0397 | MGYL | GFA   | YISILL | IVFIAG | CGKS    | ... | DKTKE     | ...  | DSKEA | QIKKSF | AKTLD  | MYPI  | IKNLED | LYDKE  | GYR   | DGE | FFKK | GDKGT | WTL   | LLTS | FSKSN | KP    | GE  | : 90 |      |
| SAU0402 | MGYL | RLV   | YIVIMV | SVFIIG | CDKSS   | ... | DTAENPKE  | ...  | GSKEA | QIKKSF | AKTLD  | MYPI  | IKNLED | LYDKE  | GYR   | DGE | FFKK | GDKGT | WTL   | LLTS | FSKSN | KP    | QGE | : 94 |      |
| SAM0399 | MEYL | RLA   | FISVIT | TIFIMG | CDSSD   | ... | TAENPKE   | ...  | GSKEA | QIKKSF | AKTLD  | MYPI  | IKNLED | LYDKE  | GYR   | DGE | FFKK | GDKGT | WTL   | LLTS | FSKSN | KP    | GE  | : 94 |      |
| SAU0396 | MRYL | RLSWY | ISILL  | IVVIAG | CGKGN   | ... | ET        | ...  | KEGS  | KEE    | QIKKSF | AKTLD | MYPI   | IKNLED | LYDKE | GYR | DGE  | FFKK  | GDKGT | WTL  | LLTS  | FSKSN | KP  | GE   | : 90 |
| SAA0410 | MGYL | RFA   | YISVMI | IFAIAG | CGKGN   | ... | ET        | ...  | KEGS  | KEE    | QIKKSF | AKTLD | MYPI   | IKNLED | LYDKE | GYR | DGE  | FFKK  | GDKGT | WTL  | LLTS  | FSKSN | KP  | GE   | : 90 |
| SAR0439 | MGYL | RFA   | YISVMI | IFAIAG | CGKGN   | ... | ET        | ...  | KEGS  | KEE    | QIKKSF | AKTLD | MYPI   | IKNLED | LYDKE | GYR | DGE  | FFKK  | GDKGT | WTL  | LLTS  | FSKSN | KP  | GE   | : 90 |
| SAM0398 | MGYL | RIG   | CISLLI | VIFVTS | CGGNKI  | ... | ET        | ...  | TG    | SKET   | QIKKSF | AKTLD | MYPI   | IKNLED | LYDKE | GYR | DGE  | FFKK  | GDKGT | WTL  | LLTS  | FSKSN | KP  | GE   | : 90 |
| SAR0442 | MGYL | RIG   | CISLLI | VIFVTS | CGGNKI  | ... | ET        | ...  | TG    | SKET   | QIKKSF | AKTLD | MYPI   | IKNLED | LYDKE | GYR | DGE  | FFKK  | GDKGT | WTL  | LLTS  | FSKSN | KP  | GE   | : 90 |
| SAA0414 | MKSI | RIG   | CISLLI | SIFVTS | CDGDNKI | ... | ET        | ...  | TG    | SKET   | QIKKSF | AKTLD | MYPI   | IKNLED | LYDKE | GYR | DGE  | FFKK  | GDKGT | WTL  | LLTS  | FSKSN | KP  | GE   | : 90 |
| SAB0393 | MNFR | QCAL  | CIGTSV | ILLVGS | CSGVFD  | ... | ET        | ...  | PE    | SKET   | QIKKSF | AKTLD | MYPI   | IKNLED | LYDKE | GYR | DGE  | FFKK  | GDKGT | WTL  | LLTS  | FSKSN | KP  | GE   | : 90 |
| SAC0481 | MGYL | RFA   | YISVMI | IFAIAG | CGKGN   | ... | ET        | ...  | KE    | DSKEE  | QIKKSF | AKTLD | MYPI   | IKNLED | LYDKE | GYR | DGE  | FFKK  | GDKGT | WTL  | LLTS  | FSKSN | KP  | GE   | : 90 |
| SAU0403 | MGYF | RVV   | YIIVMV | SVFIIG | CNKSS   | ... | DTSEKP    | ...  | KE    | SKET   | QIKKSF | AKTLD | MYPI   | IKNLED | LYDKE | GYR | DGE  | FFKK  | GDKGT | WTL  | LLTS  | FSKSN | KP  | QGG  | : 94 |
| SAR0443 | MRYL | RVV   | YIIVMV | SVFIIG | CNKSS   | ... | DTSEKP    | ...  | KE    | SKET   | QIKKSF | AKTLD | MYPI   | IKNLED | LYDKE | GYR | DGE  | FFKK  | GDKGT | WTL  | LLTS  | FSKSN | KP  | QGG  | : 94 |
| SAO0402 | MGYL | RFA   | YISVMI | IFAIAG | CGKGN   | ... | ET        | ...  | KE    | DSKEE  | QIKKSF | AKTLD | MYPI   | IKNLED | LYDKE | GYR | DGE  | FFKK  | GDKGT | WTL  | LLTS  | FSKSN | KP  | QGG  | : 90 |
| SAA0417 | MGYI | RMA   | YMSVFL | IIFIVG | CRNMK   | ... | DEQKKEEQ  | TNKT | DSKEE | QIKKSF | AKTLD  | MYPI  | IKNLED | LYDKE  | GYR   | DGE | FFKK | GDKGT | WTL   | LLTS | FSKSN | KP    | QGG | : 98 |      |
| SAC0484 | MGYI | RMA   | YMSVFL | IIFIVG | CRNMK   | ... | DEQKKEEQ  | TNKT | DSKEE | QIKKSF | AKTLD  | MYPI  | IKNLED | LYDKE  | GYR   | DGE | FFKK | GDKGT | WTL   | LLTS | FSKSN | KP    | QGG | : 98 |      |
| SAM0401 | MEYL | KIA   | YMSVLL | IIFIGG | CGNMK   | ... | DEQKKEEQ  | TNKT | DSKEE | QIKKSF | AKTLD  | MYPI  | IKNLED | LYDKE  | GYR   | DGE | FFKK | GDKGT | WTL   | LLTS | FSKSN | KP    | QGG | : 98 |      |
| SAU0405 | MEYL | KIA   | YMSVLL | IIFIGG | CGNMK   | ... | DEQKKEEQ  | TNKT | DSKEE | QIKKSF | AKTLD  | MYPI  | IKNLED | LYDKE  | GYR   | DGE | FFKK | GDKGT | WTL   | LLTS | FSKSN | KP    | QGG | : 98 |      |
| SAA0413 | MGYL | RLV   | YIVIMV | SVFIIG | CDKSS   | ... | DTAENKS   | ...  | KE    | SKET   | QIKKSF | AKTLD | MYPI   | IKNLED | LYDKE | GYR | DGE  | FFKK  | GDKGT | WTL  | LLTS  | FSKSN | KP  | QGG  | : 94 |
| SAU0400 | MRS  | RVV   | YISIMV | SIFITG | CG      | ... | KNEL      | ...  | KE    | DAKEE  | QIKKSF | AKTLD | MYPI   | IKNLED | LYDKE | GYR | DGE  | FFKK  | GDKGT | WTL  | LLTS  | FSKSN | KP  | QGG  | : 90 |
| SAA0411 | MRYL | KLAWF | SIVIT  | GIFIFI | CGDSS   | ... | DTGKA     | ...  | KE    | SKET   | QIKKSF | AKTLD | MYPI   | IKNLED | LYDKE | GYR | DGE  | FFKK  | GDKGT | WTL  | LLTS  | FSKSN | KP  | QGG  | : 94 |
| SAU0398 | MGYS | RFA   | YISVMI | IFAIAG | CGK     | ... | SDTKE     | ...  | GS    | KEE    | QIKKSF | AKTLD | MYPI   | IKNLED | LYDKE | GYR | DGE  | FFKK  | GDKGT | WTL  | LLTS  | FSKSN | KP  | QGG  | : 90 |
| SAB0392 | MGYL | KVGM  | CISLLI | VIFVTS | CGG     | ... | GNKITG    | ...  | DS    | KET    | QIKKSF | AKTLD | MYPI   | IKNLED | LYDKE | GYR | DGE  | FFKK  | GDKGT | WTL  | LLTS  | FSKSN | KP  | QGG  | : 90 |
| SAA0415 | MEYL | RLA   | LISVIT | TIFIMG | CDSSD   | ... | TAENPKE   | ...  | GS    | KEA    | QIKKSF | AKTLD | MYPI   | IKNLED | LYDKE | GYR | DGE  | FFKK  | GDKGT | WTL  | LLTS  | FSKSN | KP  | QGG  | : 94 |
| SAC0482 | MEYL | RLA   | LISVIT | TIFIMG | CDSSD   | ... | TAENPKE   | ...  | GS    | KEA    | QIKKSF | AKTLD | MYPI   | IKNLED | LYDKE | GYR | DGE  | FFKK  | GDKGT | WTL  | LLTS  | FSKSN | KP  | QGG  | : 94 |
| SAB0394 | MRYL | RVV   | YRIVMV | SVFIIG | CDKSS   | ... | DTSEKPE   | ...  | DS    | KEA    | QIKKSF | AKTLD | MYPI   | IKNLED | LYDKE | GYR | DGE  | FFKK  | GDKGT | WTL  | LLTS  | FSKSN | KP  | QGG  | : 94 |
| SAO0404 | MKSI | RIG   | CISLLI | IIFVTS | CD      | ... | GNKIIG    | ...  | DS    | KEE    | QIKKSF | AKTLD | MYPI   | IKNLED | LYDKE | GYR | DGE  | FFKK  | GDKGT | WTL  | LLTS  | FSKSN | KP  | QGG  | : 90 |
| SAA0418 | MKSI | RIG   | CISLLI | IIFVTS | CD      | ... | GNKIIG    | ...  | DS    | KEE    | QIKKSF | AKTLD | MYPI   | IKNLED | LYDKE | GYR | DGE  | FFKK  | GDKGT | WTL  | LLTS  | FSKSN | KP  | QGG  | : 90 |
| SAC0485 | MKSI | RIG   | CISLLI | IIFVTS | CD      | ... | GNKIIG    | ...  | DS    | KEE    | QIKKSF | AKTLD | MYPI   | IKNLED | LYDKE | GYR | DGE  | FFKK  | GDKGT | WTL  | LLTS  | FSKSN | KP  | QGG  | : 90 |
| SAU0404 | MKSI | RIG   | CISLLI | IIFVTS | C       | ... | GNKITG    | ...  | DS    | KEE    | QIKKSF | AKTLD | MYPI   | IKNLED | LYDKE | GYR | DGE  | FFKK  | GDKGT | WTL  | LLTS  | FSKSN | KP  | QGG  | : 89 |
| SAR0444 | MKSI | RIG   | CISLLI | IIFVTS | CD      | ... | GNKITG    | ...  | DS    | KEE    | QIKKSF | AKTLD | MYPI   | IKNLED | LYDKE | GYR | DGE  | FFKK  | GDKGT | WTL  | LLTS  | FSKSN | KP  | QGG  | : 90 |
| SAA0416 | MKCF | QK    | YIFILL | IVLMAG | CE      | ... | SNKITG    | ...  | DS    | KET    | QIKKSF | AKTLD | MYPI   | IKNLED | LYDKE | GYR | DGE  | FFKK  | GDKGT | WTL  | LLTS  | FSKSN | KP  | QGG  | : 87 |
| SAC0483 | MKCF | QK    | YIFILL | IVLMAG | CE      | ... | SNKITG    | ...  | DS    | KET    | QIKKSF | AKTLD | MYPI   | IKNLED | LYDKE | GYR | DGE  | FFKK  | GDKGT | WTL  | LLTS  | FSKSN | KP  | QGG  | : 87 |
| SAB0395 | MKCF | QK    | YIFILL | IVLMAG | CE      | ... | SNKITG    | ...  | DS    | KET    | QIKKSF | AKTLD | MYPI   | IKNLED | LYDKE | GYR | DGE  | FFKK  | GDKGT | WTL  | LLTS  | FSKSN | KP  | QGG  | : 87 |
| SAM0400 | MGYF | RVV   | YIIVMV | SVFIIG | CDKSS   | ... | DTSEKSKG  | ...  | DS    | KEA    | QIKKSF | AKTLD | MYPI   | IKNLED | LYDKE | GYR | DGE  | FFKK  | GDKGT | WTL  | LLTS  | FSKSN | KP  | QGG  | : 94 |
| SAU0401 | MGYS | RFA   | YISILL | IVMVAG | CG      | ... | KDETKE    | ...  | DS    | KEE    | QIKKSF | AKTLD | MYPI   | IKNLED | LYDKE | GYR | DGE  | FFKK  | GDKGT | WTL  | LLTS  | FSKSN | KP  | QGG  | : 90 |
| SAR0445 | MEYL | KIA   | YMSVLL | IIFIGG | CGNM    | ... | KDEQKKEEQ | TNKT | DS    | KEE    | QIKKSF | AKTLD | MYPI   | IKNLED | LYDKE | GYR | DGE  | FFKK  | GDKGT | WTL  | LLTS  | FSKSN | KP  | QGG  | : 98 |

Predicted signal peptide Cys

3'-variable region

|         |      |      |       |        |       |     |         |    |       |      |      |       |        |        |     |      |       |    |     |    |       |      |    |     |       |
|---------|------|------|-------|--------|-------|-----|---------|----|-------|------|------|-------|--------|--------|-----|------|-------|----|-----|----|-------|------|----|-----|-------|
| SAR0438 | IDDE | GMVL | YLN   | RNTKKA | TGY   | FVN | KIYDDIS | .. | KNQNE | KKYR | VELK | NKIVL | DNVE   | EKLKQK | IEN | FFFS | QYADF | FD | KNY | QD | GSITT | NENI | PS | YEA | : 188 |
| SAB0389 | IDDE | GMVL | YLN   | RNTKKA | TGY   | FVN | KIYDDIS | .. | KNQNE | KKYR | VELK | NKIVL | DNVE   | EKLKQK | IEN | FFFS | QYADF | FD | KNY | QD | GSITT | NENI | PS | YEA | : 188 |
| SAU0397 | IDDE | GMVL | YLN   | RNTKKA | TGY   | FVN | KIYDDIS | .. | KNQNE | KKYR | VELK | NKIVL | DNVE   | EKLKQK | IEN | FFFS | QYADF | FD | KNY | QD | GSITT | NENI | PS | YEA | : 192 |
| SAO0405 | LDDE | GMVL | YLN   | RNTKKA | TGY   | FVN | KVYDDIS | .. | KNHNE | KKYR | VELK | NKIVL | DNVE   | EKLKQK | IEN | FFFS | QYADF | FD | KNY | QD | GNITT | NENI | PS | YEA | : 196 |
| SAC0486 | LDDE | GMVL | YLN   | RNTKKA | TGY   | FVN | KVYDDIS | .. | KNHNE | KKYR | VELK | NKIVL | DNVE   | EKLKQK | IEN | FFFS | QYADF | FD | KNY | QD | GNITT | NENI | PS | YEA | : 196 |
| SAA0419 | LDDE | GMVL | YLN   | RNTKKA | TGY   | FVN | KIYDDIS | .. | KNHNE | KKYR | VELK | NKIVL | DNVE   | EKLKQK | IEN | FFFS | QYADF | FD | KNY | QD | GSITT | NENI | PS | YEA | : 196 |
| SAM0397 | IDDE | GMVL | FLN   | RNIKKA | TGY   | YTS | KVHDEFN | .. | EKEHQ | KKYR | VELK | NKIVL | DNVE   | EKLKQK | IEN | FFFS | QYADF | FD | KNY | QD | GNISS | ADN  | PS | YEA | : 188 |
| SAU0402 | MNSE | GMVL | HFN   | RNTR   | TAKGH | FV  | TTFYRNG | .. | KLARE | KKYR | VELK | NKIVL | DNVE   | EKLKQK | IEN | FFFS | QYADF | FD | KNY | QD | GNISS | ADN  | PS | YEA | : 192 |
| SAM0399 | MDS  | GMVL | NLDRN | RNTKKA | TGY   | FVN | KIYDDIS | .. | KNHNE | KKYR | VELK | NKIVL | DNVE   | EKLKQK | IEN | FFFS | QYADF | FD | KNY | QD | GNISS | ADN  | PS | YEA | : 192 |
| SAU0396 | LDDE | GMVL | NLDRN | RNTKKA | TAKGH | FV  | TTFYRNG | .. | KLARE | KKYR | VELK | NKIVL | DNVE   | EKLKQK | IEN | FFFS | QYADF | FD | KNY | QD | GNISS | ADN  | PS | YEA | : 187 |
| SAA0410 | LDDE | GMVL | NLDRN | RNTKKA | TAKGH | FV  | TTFYRNG | .. | KLARE | KKYR | VELK | NKIVL | DNVE   | EKLKQK | IEN | FFFS | QYADF | FD | KNY | QD | GNISS | ADN  | PS | YEA | : 187 |
| SAR0439 | LDDE | GMVL | NLDRN | RNTKKA | TAKGH | FV  | TTFYRNG | .. | KLARE | KKYR | VELK | NKIVL | DNVE</ |        |     |      |       |    |     |    |       |      |    |     |       |

3'-variable region

SAR0438 YKLNNSDENVKKLRDIYPIITKKAAPILKLLHIDGDIKGSVGYKKEIYKFSKVKDQETTLRDYLN.FGSEDEDS...:260  
 SAB0389 YKLNNSDTNVKCLRDIYPIITKKAAILKLLHIDGDIKGSVGYKKEIYKFSKVKDQETTLRDYLN.FGSEDEDS...:260  
 SAU0397 YKLNNSDTNVKCLRDIYPIITKKAAPILKLLHIDGDIKGSVGYKKEIYKFSKVKDQETTLRDYLN.FGSEDEDS...:264  
 SAO0405 YKMNNSDKNVKCLRREIYPIITNNSPILKLLYIDGDIKGSVGYKKEIYKFSKDKGQETTLRDYLN.FGSEGENVE...:270  
 SAC0486 YKMNNSDKNVKCLRREIYPIITNNSPILKLLYIDGDIKGSVGYKKEIYKFSKDKGQETTLRDYLN.FGSEGENVE...:270  
 SAA0419 YKMNNSDKNVKCLRREIYPIITNNSPILKLLYIDGDIKGSVGYKKEIYKFSKDKGQETTLRDYLN.FGSEGENVE...:270  
 SAM0397 YQISNTDKNVKCLRREIYPIITKKSPIVILKLLHIDGDIKGSVGYKKEIYKFSKVKDEETAVRDFVN.FGSDGVS...:260  
 SAU0402 YKRNNSDGNVKCLRREIYPIITKQSPILKLLHIDGDIKGSVGYKQIEYTFSSKEKDETFMSDFLN.FGSHSK...:263  
 SAM0399 YKRNNSDGNVKCLRREIYPIITKQSPILKLLHIDGDIKGSVGYKQIEYTFSSKEKDETFMSDFLN.FGSHSN...:263  
 SAU0396 YKMSNKDEIVKELRSRWNISFEKSPILKMHIDGDLKGSVGYRKLIEDFSKRENSKLSVIEFLS.YKAKK...:257  
 SAA0410 YKMSNKDEIVKELRSRWNISFEKSPILKMHIDGDLKGSVGYRKLIEDFSKRENSKLSVIEFLS.YKAKK...:257  
 SAR0439 FKMSNKDENVKQLRSRWNISFEKSPILKMHIDGDLKGSVGYRKLIEDFSKRENSKLSVIEFLS.YKAKK...:257  
 SAM0398 YKMSNKDENVKQLRSRWNIPDKAPVILKMHIDGDLKGSVGYRKLIEDFSK.EDRDISVIDYLS.YKAKK...:256  
 SAR0442 YKMSNKDENVKQLRSRWNIPDKAPVILKMHIDGDLKGSVGYRKLIEDFSK.EDRDISVIDYLS.YKAKK...:256  
 SAA0414 YKMSNKDENVKQLRSRWNIPDKAPVILKMHIDGDLKGSVGYRKLIEDFSK.EGRDISVIDYLS.YKAKK...:256  
 SAB0393 YKMSNKDENVKQLRSRWNIPDKAPVILKMHIDGDLKGSVGYRKLIEDFSK.EDRDISVIDYLS.YKAKK...:256  
 SAC0481 YKMSNKDENVKQLRSRWNIPDKAPVILKMHIDGDLKGSVGYRKLIEDFSK.EGRDISVIDYLS.YKAKK...:256  
 SAU0403 FKMSNKDENVKQLRSRWNIPDKAPVILKMHIDGDLKGSVGYRKLIEDFSKGEKSDLSVIDSLN.FQAKVDEDEDE:266  
 SAR0443 FKMSNKDENVKQLRSRWNIPDKAPVILKMHIDGDLKGSVGYRKLIEDFSKGEKSDLSVIDSLN.FQAKVNEDDE:266  
 SAO0402 FKMSNKDENVKQLRSRWNIPDKAPVILKMHIDGDLKGSVGYRKLIEDFSKGEKSDLSVIDSLN.FQAKVDEDEDE:262  
 SAA0417 FKMSNKDENVKQLRSRWNIPDKAPVILKMHIDGDLKGSVGYRKLIEDFSKGEKSDLSVIDSLN.FQAKVDEDEDE:270  
 SAC0484 FKMSNKDENVKQLRSRWNIPDKAPVILKMHIDGDLKGSVGYRKLIEDFSKGEKSDLSVIDSLN.FQAKVDEDEDE:270  
 SAM0401 FKMSNKDENVKQLRSRWNIPDKAPVILKMHIDGDLKGSVGYRKLIEDFSKGEKSDLSVIDSLN.FQAKVDEDEDE:270  
 SAU0405 YKMSNKDENVKQLRSRWNIPDKSPVILKMHIDGDLKGSVGYRKLIEDFSKRENSHLSVIDSLD.YQAKVDEDEDE:270  
 SAA0413 YKMSNKDENVKQLRSRWNIPDKSPVILKMHIDGDLKGSVGYRKLIEDFSKRENSHLSVIDSLD.YQAKTNKDDDE:266  
 SAU0400 FKMSNKDENVKQLRSRWNIPDKAPVILKMHIDGDLKGSVGYRKLIEDFSKEENSELSIVDSLN.FQAK.NKDDDE:261  
 SAA0411 FKMSNKDENVKQLRSRWNIPDKAPVILKMHIDGDLKGSVGYRKLIEDFSKEENSELSIVDSLN.FQAKKNKDDDE:266  
 SAU0398 YQLKNSDYNVQQLRKRWDISFEKAPKLLKKTGDLKGSVGYKKEIYKFTFVENQENIYFTDSIY.FNSEDK...:261  
 SAB0392 FQLSNDYVQQLRKRWDISFEKAPKLLKKTGDLKGSVGYKKEIYKFTFVENQENIYFTDSIY.FTSEDEY...:261  
 SAA0415 YQLHNSDYNVQQLRKRWDISFKETPKLLKGGGDLKNSVGYKKEIYKFTFVERKGENIYFNDSVE.FIISK...:263  
 SAC0482 YQLHNSDYNVQQLRKRWDISFKETPKLLKGGGDLKNSVGYKKEIYKFTFVERKGENIYFNDSVE.FIISK...:263  
 SAO0394 YQLHNSDYNVQQLRKRWDISFEKAPKLLKGGGDLKNSVGYKKEIYKFTFVERKGENIYFNDSVE.FIISK...:263  
 SAO0404 YQLKNSDYNVQQLRKRWNIPQKAPKLLKGSGLKGSVGYKKEIYKFTFIENKKEENIYFTDSIY.FNSEDK...:261  
 SAA0418 YQLKNSDYNVQQLRKRWNIPQKAPKLLKGSGLKGSVGYKKEIYKFTFIENKKEENIYFTDSIY.FNSEDK...:261  
 SAC0485 YQLKNSDYNVQQLRKRWNIPQKAPKLLKGSGLKGSVGYKKEIYKFTFIENKKEENIYFTDSIY.FNSEDK...:261  
 SAU0404 YQLKNSDYNVQQLRKRWNIPQKAPKLLKGSGLKGSVGYKKEIYKFTFIENKKEENIYFTDSVY.FNSEDK...:260  
 SAR0444 YQLKNSDYNVQQLRKRWNIPQKAPKLLKGSGLKGSVGYKKEIYKFTFIENKKEENIYFTDSVY.FNSEDK...:264  
 SAA0416 YQLKNSDYNVQQLRKRWNIPQKAPKLLKGSGLKGSVGYKKEIYKFTFIENKKEENIYFTDSIN.FNSEDK...:258  
 SAC0483 YQLKNSDYNVQQLRKRWNIPQKAPKLLKGSGLKGSVGYKKEIYKFTFIENKKEENIYFTDSIN.FNSEDK...:258  
 SAB0395 YQLKNSDYNVQQLRKRWNIPQKAPKLLKGSGLKGSVGYKKEIYKFTFIENKKEENIYFTDSIY.FNSEDK...:258  
 SAM0400 YQLKNSDYNVQQLRKRWNIPQKAPKLLKGSGLKGSVGYKKEIYKFTFIENKKEENIYFTDSVY.FNSEDK...:265  
 SAU0401 YKMKRNDNRNIQQLKRRFNLIKSKTPRLFLFKGSGDIKGSVGYKKEIYKFTFVSRKKEAFMLTALSSFQVTK...:260  
 SAR0445 YKINDDDNINIKQLKRNRFNIKSNKNPRLFLFKGSGDIKGSVGYKKEIYKFTFVSRKKEESVSCIDISIE.FKSEGDYNE...:272
