# Supplementary material
Source: PubMed Central journal article supplement (PMC2639338)

Figure S1

(A)

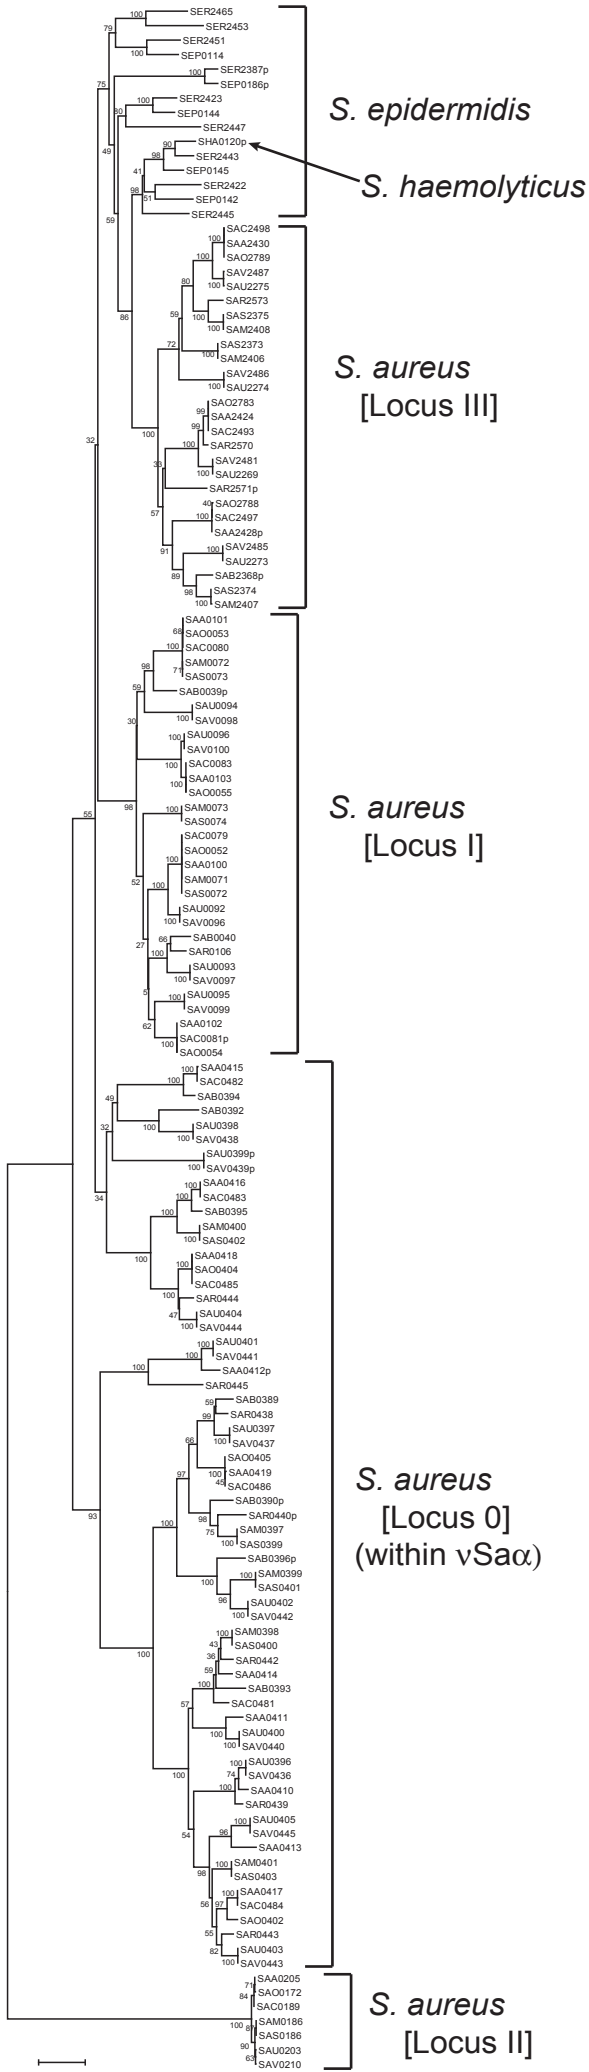

(B)

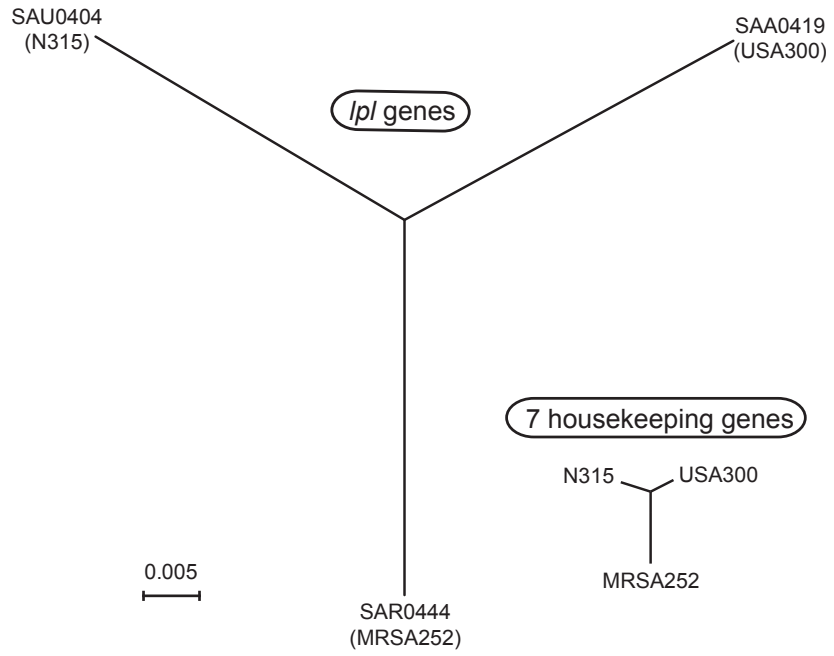

Supplement: msn192_1.pdf [file msn192_1.pdf]

Figure S2

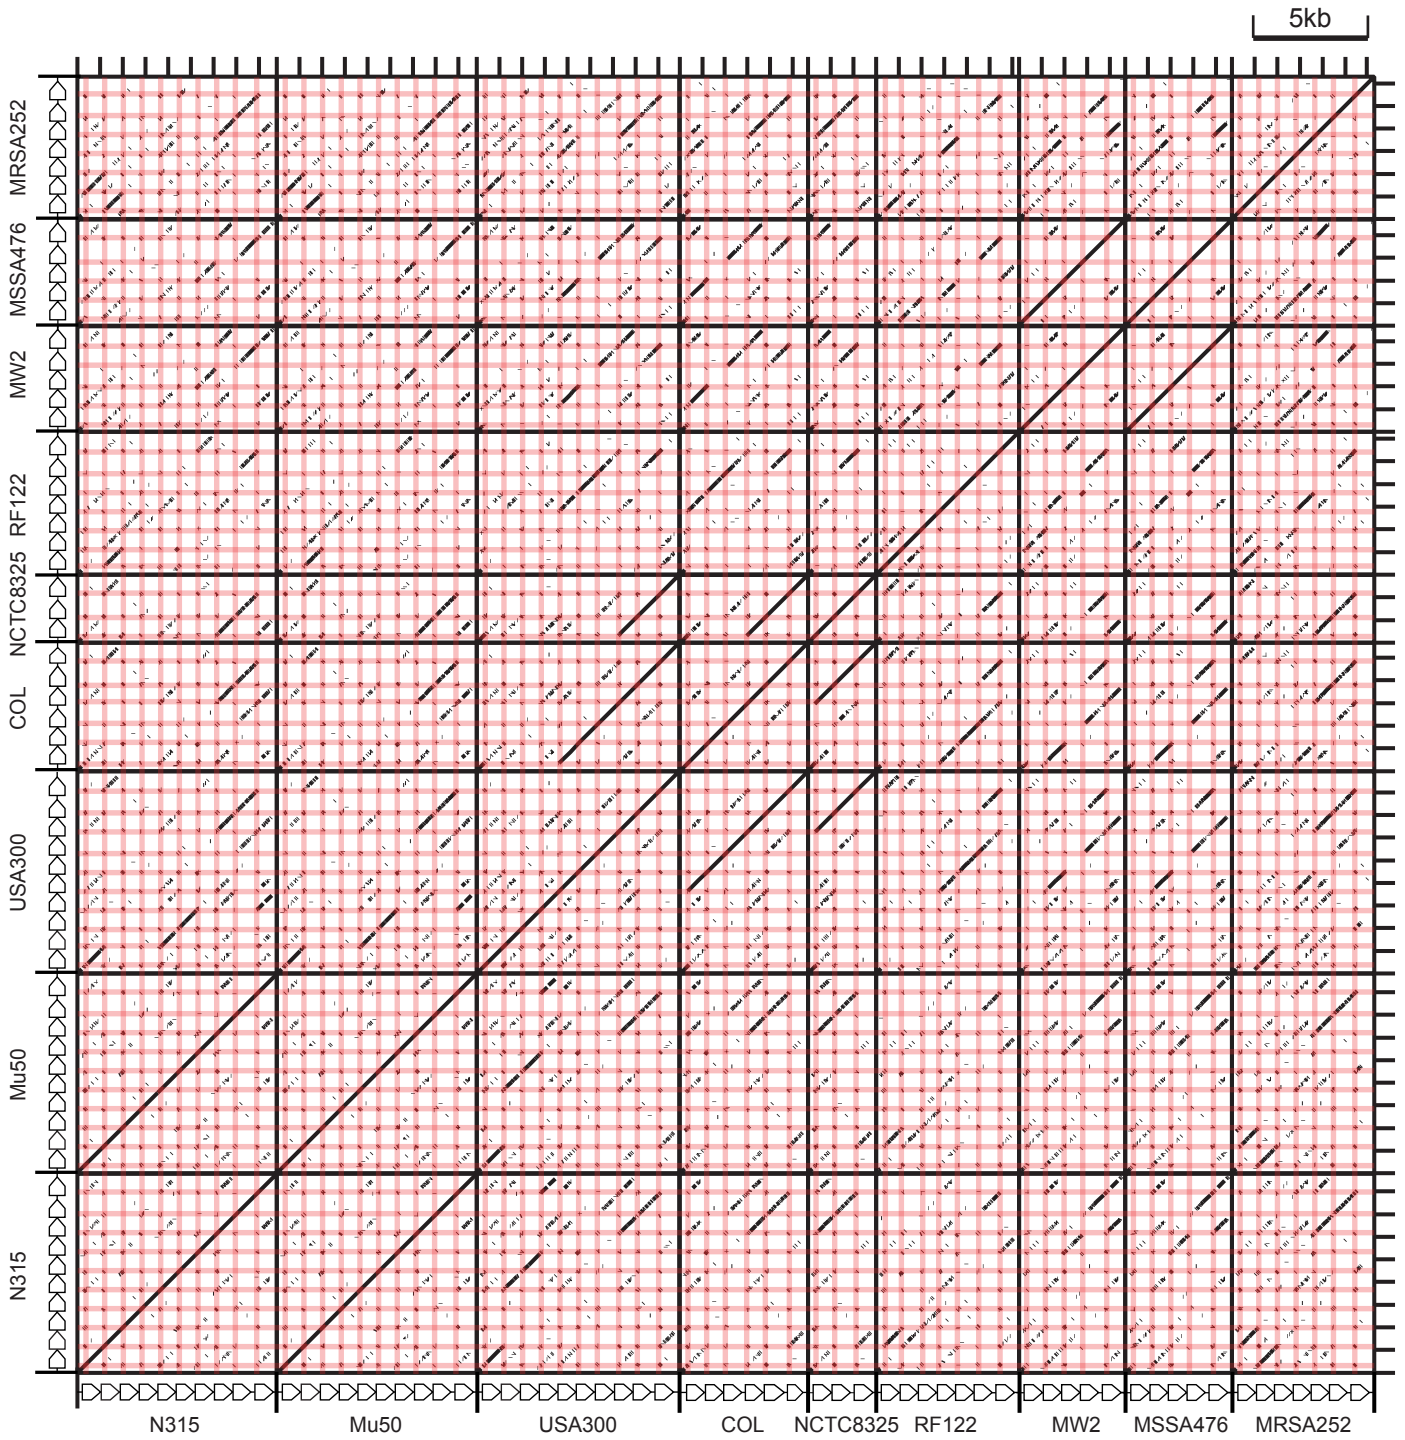

Supplement: msn192_2.pdf [file msn192_2.pdf]
